# Supplementary material for: Magnetic MIL-101-SO3H: a highly efficient bifunctional nanocatalyst for the synthesis of 1,3,5-triarylbenzenes and 2,4,6-triaryl pyridines
Source: Royal Society of Chemistry journal article supplement (doi:10.1039/c6ra24574a), 2016-01-01
Supplement: c6ra24574a1.pdf [file c6ra24574a1.pdf]

Supporting information

**Magnetic MIL-101-SO<sub>3</sub>H: A highly efficient bifunctional nanocatalyst for the synthesis of 1,3,5-triarylbenzenes and 2,4,6-triaryl pyridines**

Mahmoud Borjian Boroujeni, Alireza Hashemzadeh, Mohammad-Tayeb Faroughi, Ahmad Shaabani,\* Mostafa Mohammadpour Amini\*

*Faculty of Chemistry, Shahid Beheshti University, G. C., P. O. Box 19396-4716, Tehran, Iran*

\* Email addresses: [a-shaabani@sbu.ac.ir](mailto:a-shaabani@sbu.ac.ir), [m-pouramini@sbu.ac.ir](mailto:m-pouramini@sbu.ac.ir)

**spectral data**

1,3,5-Triphenylbenzene (2a), C<sub>24</sub>H<sub>18</sub>, white solid (0.28 g, 90 %), FT-IR (KBr) cm<sup>-1</sup>: 1591, 1440, 1410, 871, 751, 695. <sup>1</sup>H NMR (300.13 MHz, CDCl<sub>3</sub>), δ 7.82 (s, 3H), 7.75 (d, J=6.9 Hz, 6H), 7.51 (t, J=6.9 Hz, 6H), 7.42 (d, J=7.2 Hz, 3H).

1,3,5-Tri(*p*-tolyl) benzene (2b), C<sub>27</sub>H<sub>24</sub>, yellow solid (0.30 g, 85 %), FT-IR (KBr) cm<sup>-1</sup>: 3020, 2965 1590, 1513, 1450, 1185, 871, 1060, 807, 735, 720. <sup>1</sup>H NMR (300.13 MHz, CDCl<sub>3</sub>), δ 7.80 (s, 3H), 7.73 (d, J=8 Hz, 6H), 7.56 (d, J=8 Hz, 6H), 2.32 (s, 9H).

1,3,5-Tris(4-bromophenyl)benzene(2c), C<sub>24</sub>H<sub>15</sub>Br<sub>3</sub>, yellow solid (0.32, 80%), FT-IR (KBr) cm<sup>-1</sup>: 3023, 2968 1592, 1515, 1452, 1186, 873, 1064, 810, 738, 723. <sup>1</sup>H NMR (300.13 MHz, CDCl<sub>3</sub>), δ 7.68 (s, 3H), 7.60 (d, J=8.5 Hz, 6H), 7.53 (d, J=8.5, 6H).

1,3,5-Tris(4-chlorophenyl)benzene (2d), C<sub>24</sub>H<sub>15</sub>Cl<sub>3</sub>, yellow solid (0.30, 80%), FT-IR (KBr) cm<sup>-1</sup>: 3025, 2967, 1591, 1516, 1453, 1184, 875, 1062, 813, 738, 723. <sup>1</sup>H NMR (300.13 MHz, CDCl<sub>3</sub>), δ 7.69 (s,3H), 7.60 (d, J=8.5 Hz, 6H), 7.45 (d, J=8.5 Hz, 6H).

1,3,5-Tris(4-fluorophenyl)benzene (2e),  $C_{24}H_{15}Cl_3$ , yellow solid (0.29, 80%), FT-IR (KBr)  $cm^{-1}$ : 3025, 2963, 1593, 1512, 1450, 1183, 871, 1063, 811, 738, 723.  $^1H$  NMR (300.13 MHz,  $CDCl_3$ ),  $\delta$  7.69 (s, 3H), 7.60 (d,  $J=8.5$  Hz, 6H), 7.53 (d,  $J=8.5$  Hz, 6H).

1,3,5-Tris(4-methoxyphenyl)benzene (2f), yellow solid (0.27, 75%), FT-IR (KBr)  $cm^{-1}$ : 3025, 2985, 1591, 1516, 1453, 1184, 875, 1062, 813, 738, 723.  $^1H$  NMR (300.13 MHz,  $CDCl_3$ ),  $\delta$  7.65 (s, 3H), 7.61 (d,  $J=9$  Hz, 6H), 6.99 (d,  $J=8.5$  Hz, 6H).

2,4,6-Triphenylpyridine (4a),  $C_{23}H_{17}N$ , white solid (0.28 g, 90 %), FT-IR (KBr)  $cm^{-1}$ : 1450-1600, 759, 691  $^1H$  NMR (300.13 MHz,  $CDCl_3$ ),  $\delta$  8.24 (d,  $J=7.5$  Hz, 4H), 7.90 (s, 2H), 7.72 (d,  $J=6.9$ , 2H), 7.21-7.90 (9H, m).

2,6-Diphenyl-4-(*p*-tolyl)pyridine (4b),  $C_{24}H_{19}N$ , white solid (0.27 g, 85 %), FT-IR (KBr)  $cm^{-1}$ : 3020, 2950, 1450-1600, 759, 692.  $^1H$  NMR (300.13 MHz,  $DMSO-d_6$ ),  $\delta$  8.2 (d, 4H), 7.9 (s, 2H), 7.7 (d, 2H), 7.2-7.9 (9H, m, H-Ar), 2.48 (s, 3H).

4-(4-Chlorophenyl)-2,6-diphenylpyridine (4c), yield: 95,  $C_{23}H_{16}ClN$ , white solid, FT-IR (KBr)  $cm^{-1}$ : 3061, 1599, 1545, 1489, 775, 692,  $^1H$  NMR (300.13 MHz,  $DMSO-d_6$ ),  $\delta$  8.12 (d,  $J=7.2$  Hz, 4H), 8.14 (s, 2H), 7.91 (d,  $J=8$  Hz, 2H), 7.41 (d,  $J=6.8$  Hz, 2H), 7.28-7.36 (m, 6H).

4-Phenyl-2,6-di-*p*-tolylpyridine (4d),  $C_{25}H_{21}N$ , white solid (0.29 g, 85 %), FT-IR (KBr)  $cm^{-1}$ : 3021, 2952, 1450, 1600, 758, 695.  $^1H$  NMR (300.13 MHz,  $CDCl_3$ ),  $\delta$  8.13 (d,  $J=7.8$  Hz, 4H), 7.87 (s, 2H), 7.76 (d,  $J=7.2$  Hz, 2H), 7.47-7.58 (m, 3H), 7.34 (d,  $J=7.8$  Hz, 4H), 2.46 (s, 6H).

2,4,6-Tri-*p*-tolylpyridine (4e),  $C_{26}H_{23}N$ , white solid (0.28, 80 %), FT-IR (KBr)  $cm^{-1}$ : 3024, 2952, 1453, 1602, 758, 697.  $^1H$  NMR (300.13 MHz,  $CDCl_3$ ),  $\delta$  8.13 (d,  $J=7.8$  Hz, 4H), 7.87 (s, 2H), 7.79 (d,  $J=7.8$  Hz, 2H), 7.34-7.37 (m, 6H), 2.47 (s, 9H).

2,6-Bis(4-chlorophenyl)-4-phenylpyridine (4f),  $C_{23}H_{15}Cl_2N$  (0.32, 85 %), FT-IR (KBr)  $cm^{-1}$ : 3052, 1489, 1486, 1597, 1524, 760, 694,  $^1H$  NMR (300.13 MHz,  $DMSO-d_6$ ),  $\delta$  8.36 (d,  $J=8.4$  Hz, 4H), 8.23 (s, 2H), 8.04 (d,  $J=7.6$  Hz, 2H), 7.50- 7.61 (m, 7H),  $^{13}C$  NMR (75.47 MHz,  $DMSO-d_6$ ).

2,6-Bis(4-chlorophenyl)-4-(4-methoxyphenyl)pyridine (4g),  $C_{24}H_{17}Cl_2NO$  (0.32, 80 %), FT-IR (KBr)  $cm^{-1}$ : 3052, 1489, 1486, 1597, 1524, 760, 694,  $^1H$  NMR (300.13 MHz,  $DMSO-d_6$ ),  $\delta$  8.29 (d,  $J=8.4$  Hz, 4H), 8.01 (s, 2H), 7.50 (d,  $J=7.6$  Hz, 4H), 7.45 (d,  $J=6.8$  Hz, 2H), 7.09 (d,  $J=8$  Hz, 2H)

Sample: 3Ph-Bn  
1H NMR

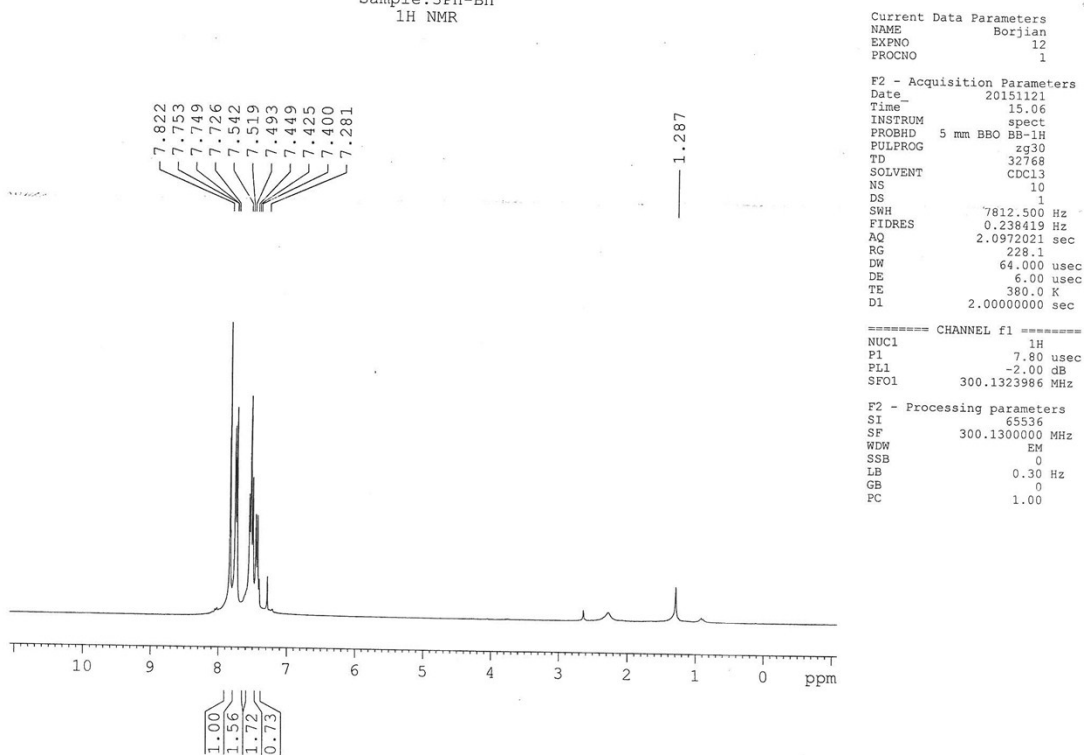

Figure 1. <sup>1</sup>H NMR spectra of 1,3,5-triphenylbenzene (2a)

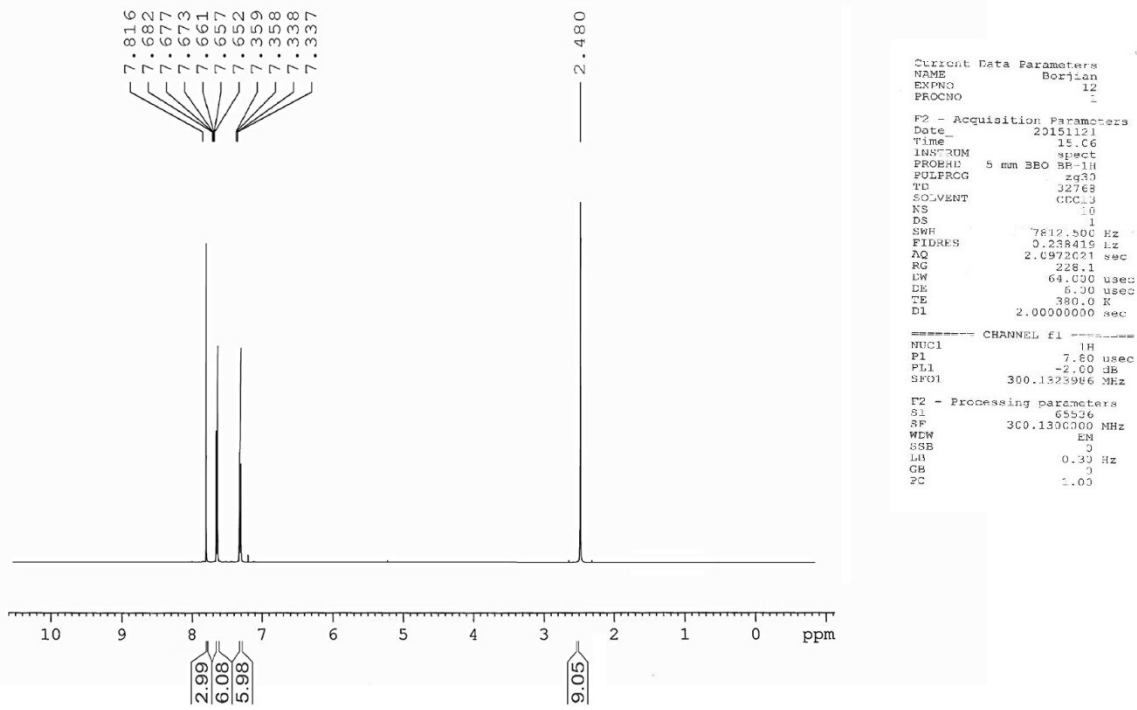

Figure 2.  $^1\text{H}$  NMR spectra of 1,3,5-tri(p-tolyl)benzene (2b)

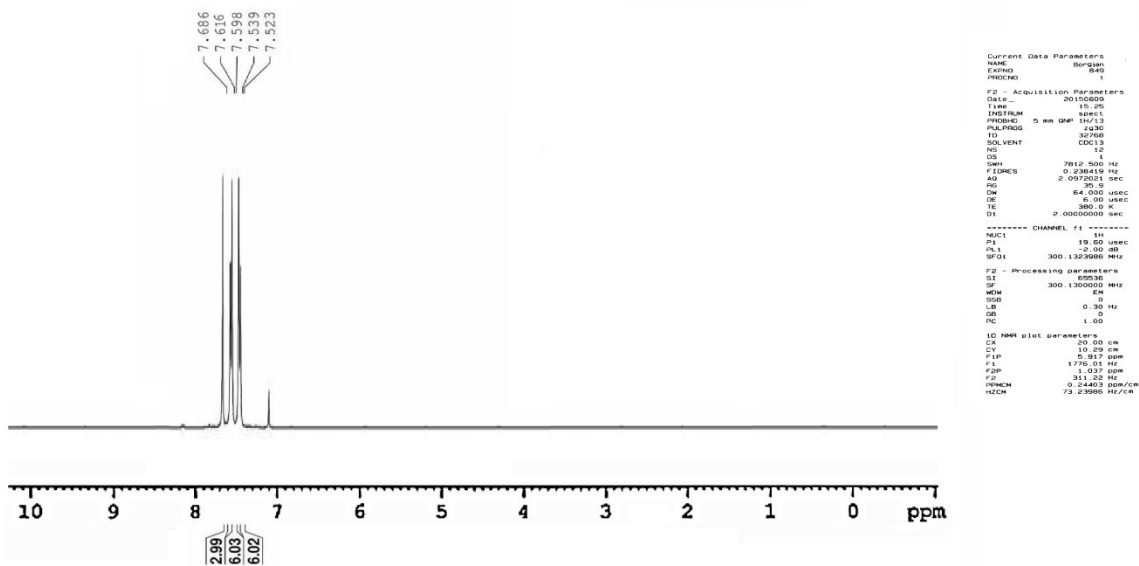

Figure 3.  $^1\text{H}$  NMR spectra of 1,3,5-tris(4-bromophenyl)benzene (2c)

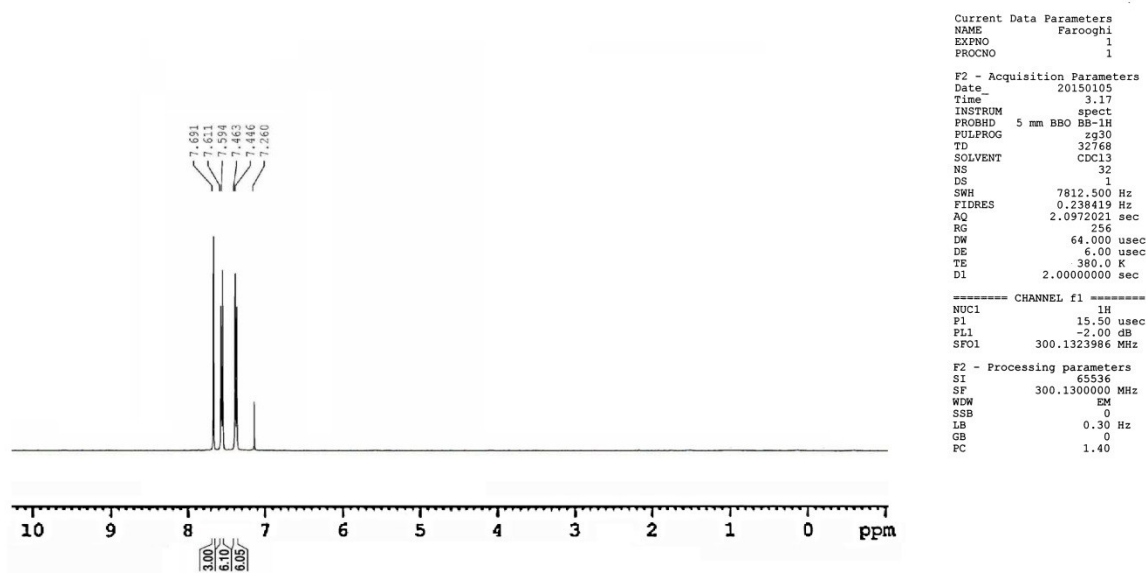

Figure 4. <sup>1</sup>H NMR spectra of 1,3,5-tris(4-chlorophenyl)benzene (2d)

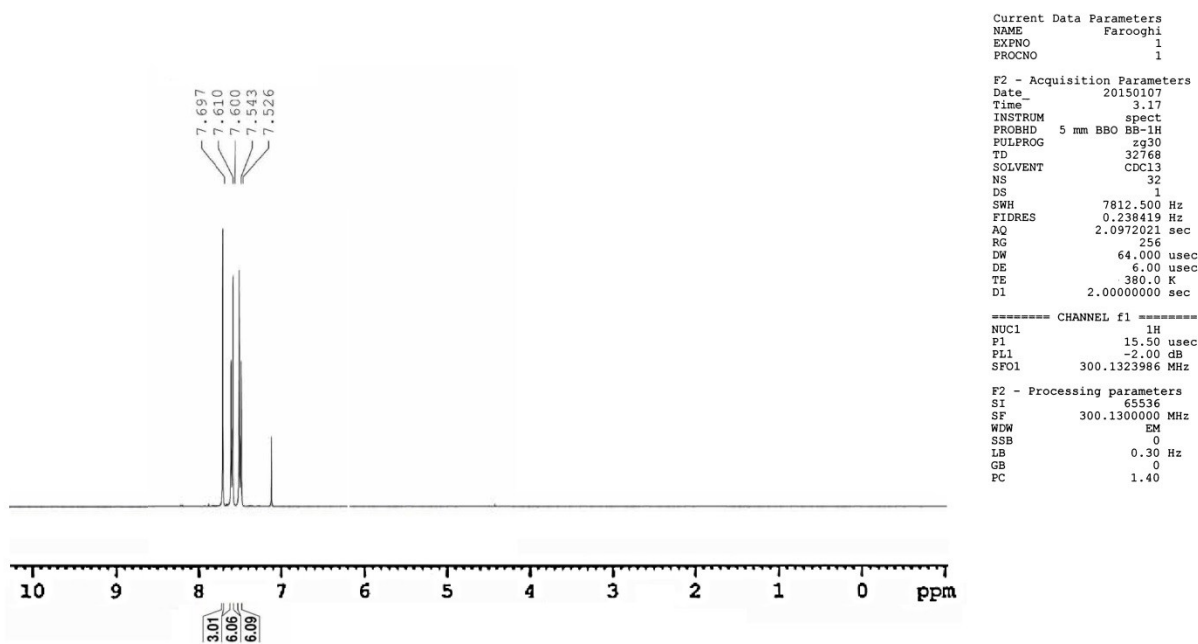

Figure 5. <sup>1</sup>H NMR spectra of 1,3,5-tris(4-fluorophenyl)benzene (2e)

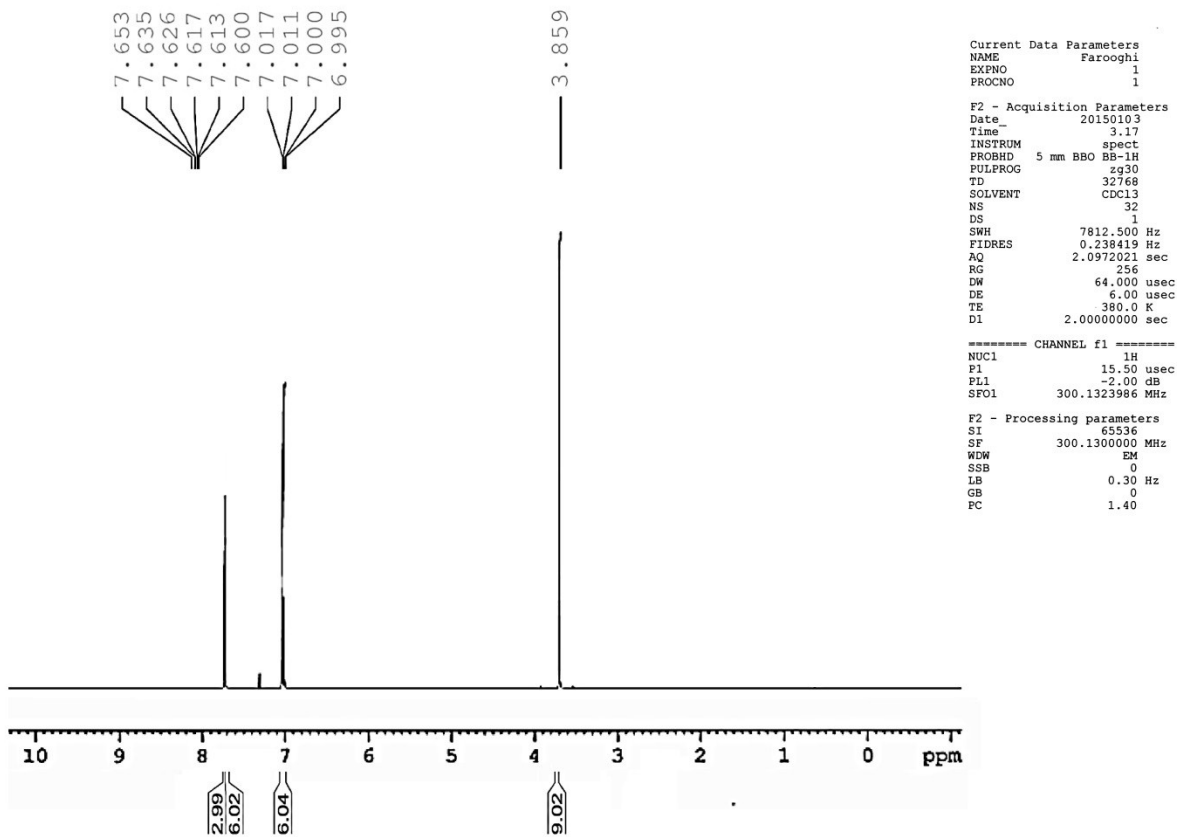

Figure 6. <sup>1</sup>H NMR spectra of 1,3,5-tris(4-methoxyphenyl)benzene (2f)

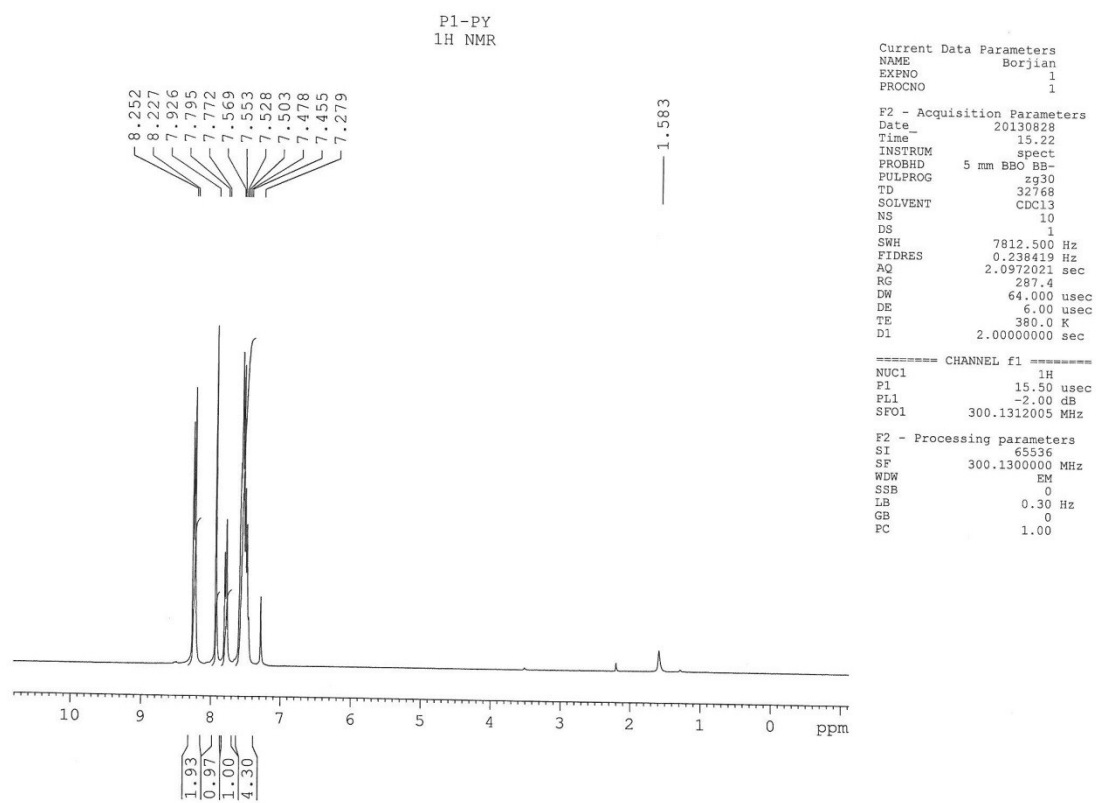

**Figure 7.**  $^1\text{H}$  NMR spectra of 2,4,6-triphenyl pyridine (4a)



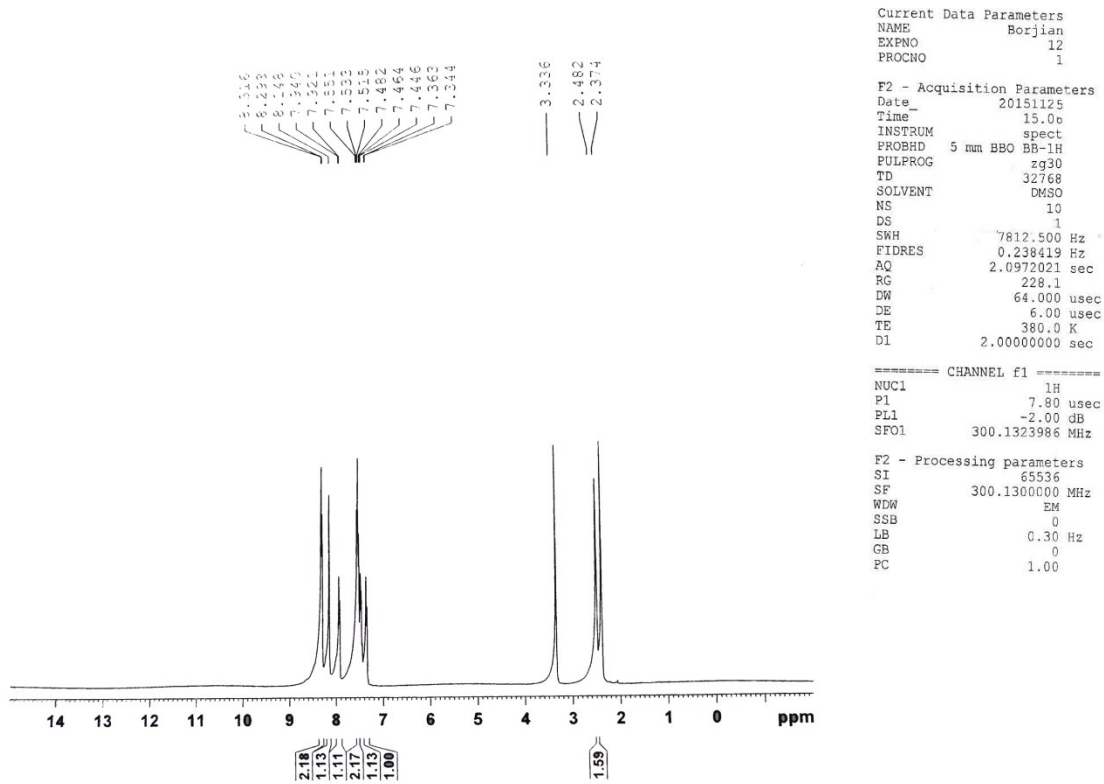

Figure 8. <sup>1</sup>H NMR spectra of 2,6-diphenyl-4-(p-tolyl)pyridine (4b)

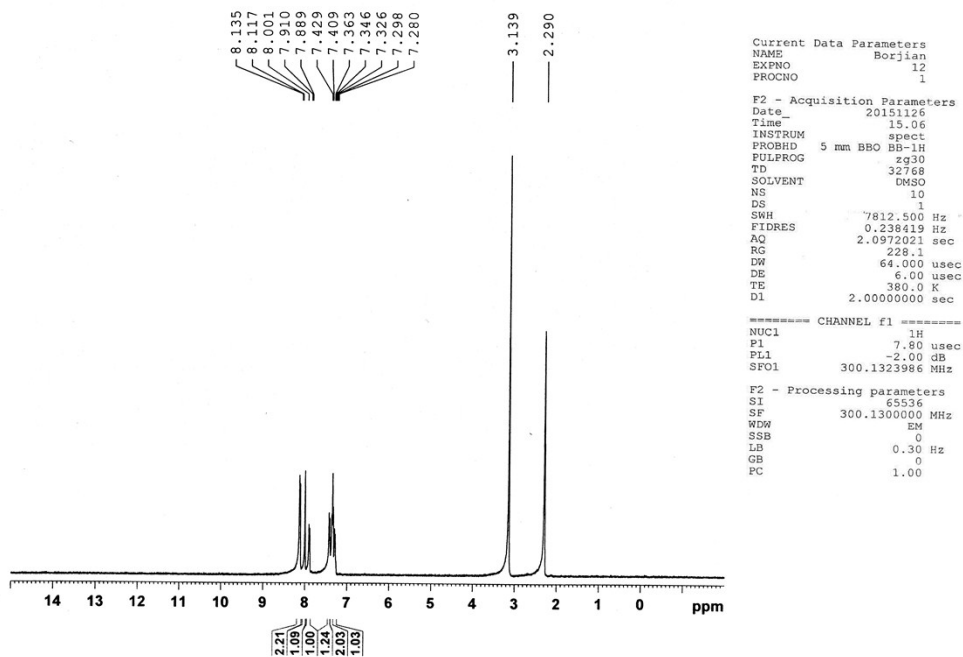

Figure 9. 4-(4-chlorophenyl)-2,6-diphenylpyridine (4c)

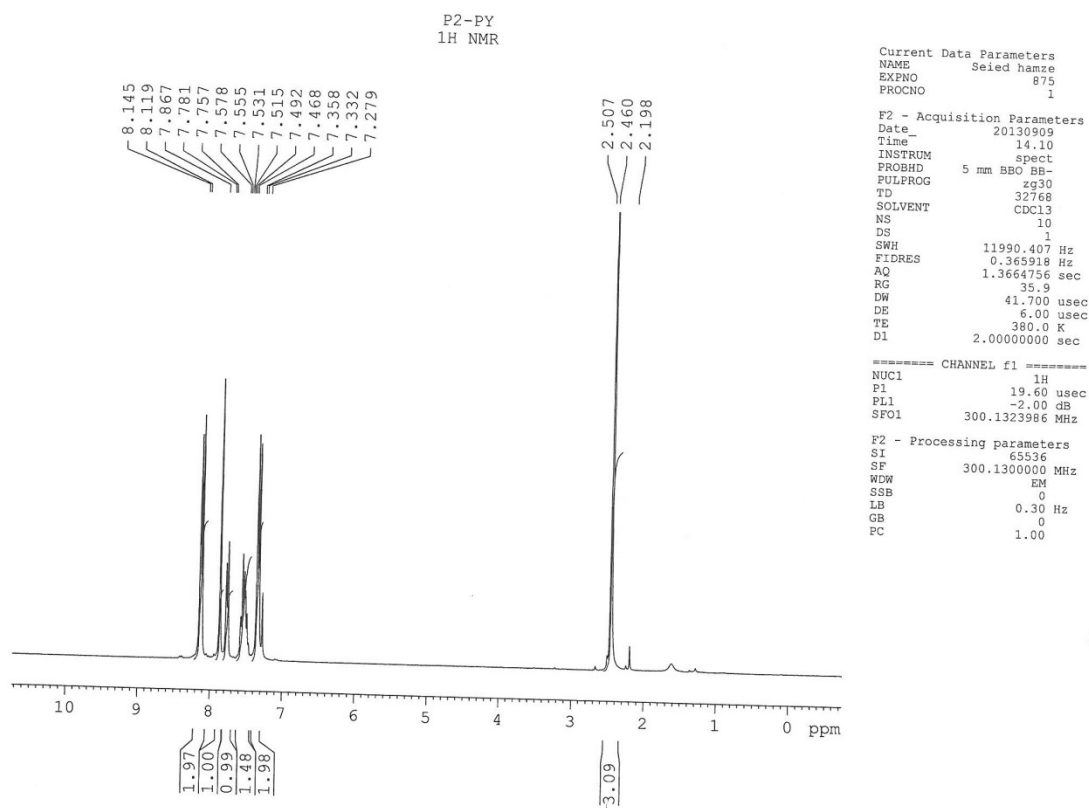

**Figure 10.**  $^1\text{H}$  NMR spectra of 4-phenyl-2,6-di-p-tolylpyridine (4d)

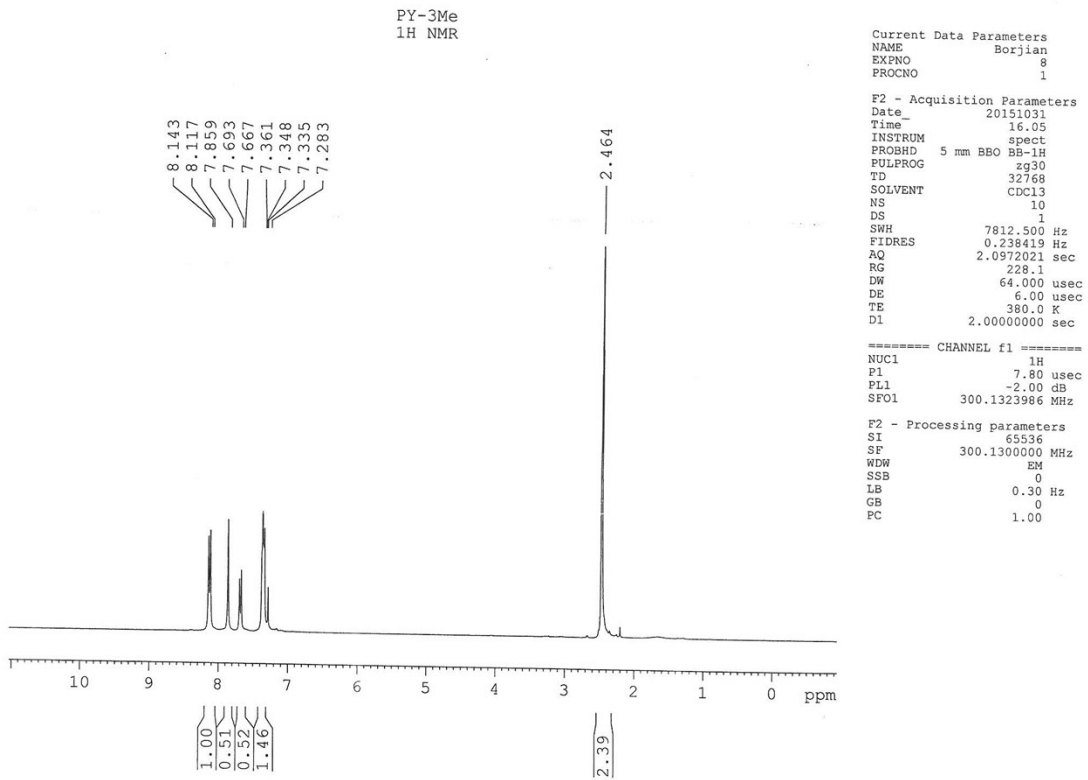

**Figure 11.** <sup>1</sup>H NMR spectra of 2,4,6-tri-p-tolylpyridine (4e)

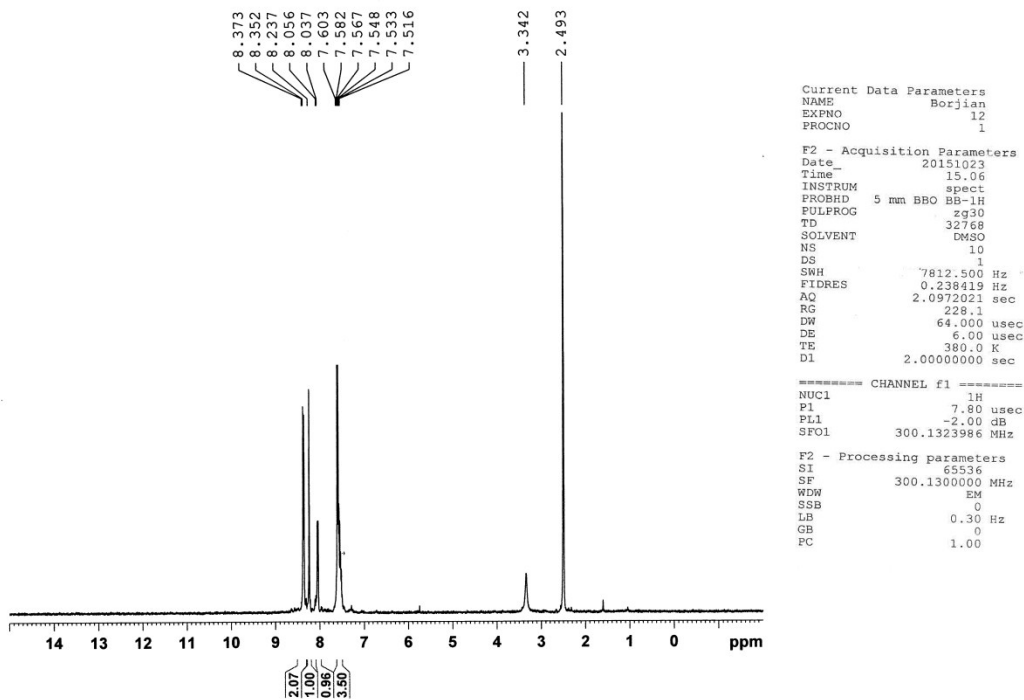

Figure 12. <sup>1</sup>H NMR spectra of 2,6-bis(4-chlorophenyl)-4-phenylpyridine (4f)

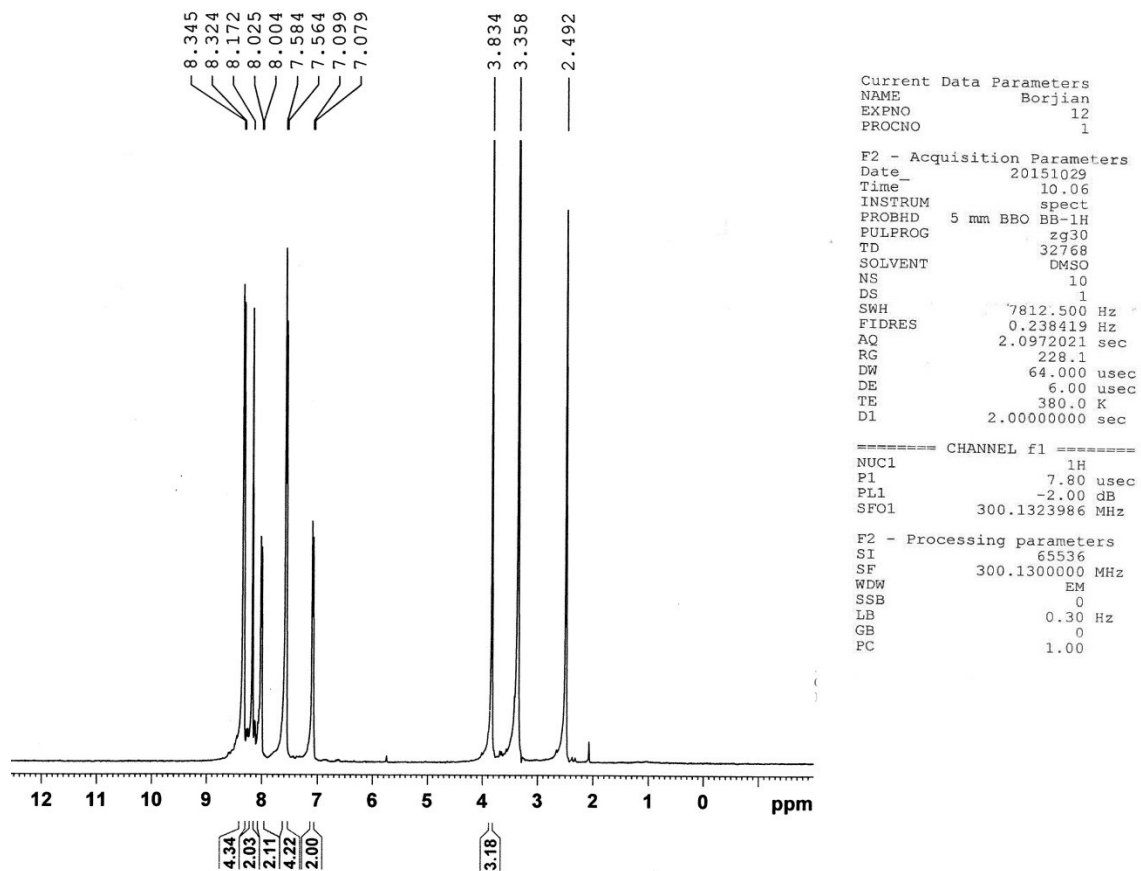

Figure 13. <sup>1</sup>H NMR spectra of 2,6-bis(4-chlorophenyl)-4-(4-methoxyphenyl)pyridine (4g)

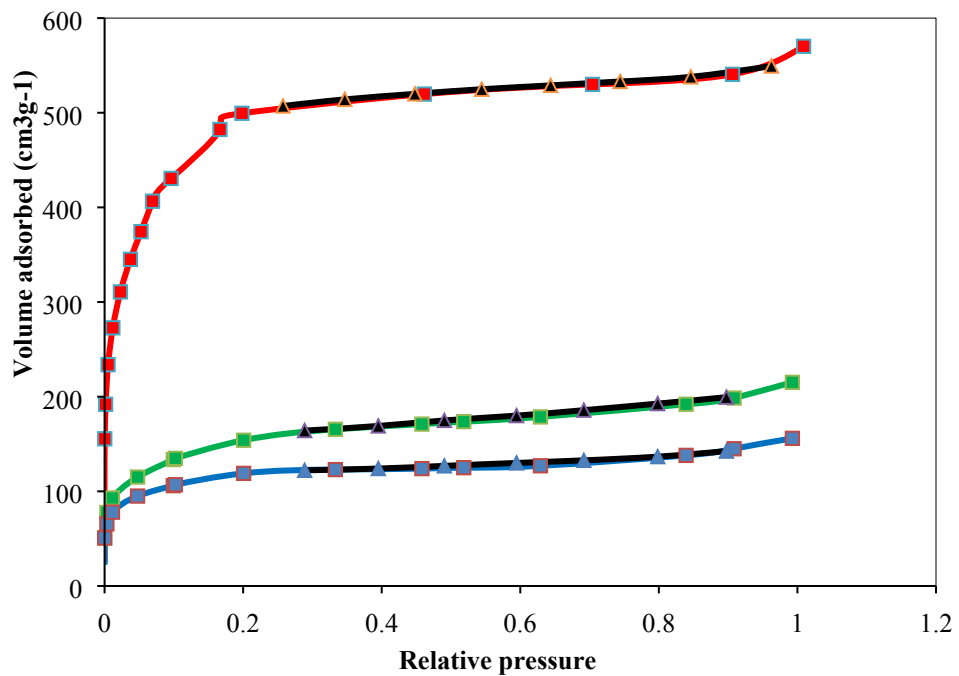

Figure 14. N<sub>2</sub> adsorption-desorption isotherms at 77 K for MIL-101(red),magnetic MIL-101 (green) and magnetic MIL-101-SO<sub>3</sub>H nanocatalyst(blue)
